# Supplementary material for: Use of flash glucose monitoring for post-bariatric hypoglycaemia diagnosis and management
Source: PubMed Central journal article supplement (PMC7338422; doi:10.1038/s41598-020-68029-8), 2020-07-06
Supplement: 41598_2020_68029_MOESM1_ESM.pdf [file 41598_2020_68029_MOESM1_ESM.pdf]

# Use of flash glucose monitoring for post-bariatric hypoglycaemia diagnosis and management

Carolina B. Lobato<sup>1,2</sup>, Sofia S. Pereira<sup>1,2</sup>, Marta Guimarães<sup>1-3</sup>, Tiago Morais<sup>1,2</sup>, Pedro Oliveira<sup>4</sup>, Jorge P. M. de Carvalho<sup>5</sup>, Mário Nora<sup>1,3</sup>, and Mariana P. Monteiro<sup>1,2,\*</sup>

<sup>1</sup>Endocrine, Cardiovascular & Metabolic Research, Unit for Multidisciplinary Research in Biomedicine (UMIB), University of Porto, Porto, 4050-313, Portugal

<sup>2</sup>Department of Anatomy, Institute of Biomedical Sciences Abel Salazar (ICBAS), University of Porto, Porto, 4050-313, Portugal

<sup>3</sup>Department of General Surgery, Centro Hospitalar de Entre o Douro e Vouga, Santa Maria da Feira, 4520-211, Portugal

<sup>4</sup>Department of Population Studies, ICBAS, University of Porto, Porto, 4050-313, Portugal

<sup>5</sup>Department of Mathematics, Faculty of Sciences, University of Porto, Porto, 4169-007, Portugal

\*mpmonteiro@icbas.up.pt

## To whom correspondence and reprint requests should be addressed:

Mariana P. Monteiro, MD, PhD

Institute of Biomedical Sciences Abel Salazar - University of Porto,  
Jorge Viterbo Ferreira 228, Ed.1, 3rd Floor, 4050-313, Porto, Portugal;

Telephone number: (00351)220428103

E-mail address: [mpmonteiro@icbas.up.pt](mailto:mpmonteiro@icbas.up.pt)

**Supplementary Table S1. ROC curve analysis of the value of LBGI<sub>FGMGT</sub> (N=13)**

| ROC curve cut-off value | Sensitivity (%) | 95% CI        | Specificity (%) | 95% CI        | Likelihood ratio |
|-------------------------|-----------------|---------------|-----------------|---------------|------------------|
| >2.6                    | 100.0           | ]67.6, 100.0[ | 20.0            | ]1.0, 62.4[   | 1.250            |
| >2.9                    | 100.0           | ]67.6, 100.0[ | 40.0            | ]7.1, 76.9[   | 1.667            |
| >3.1                    | 100.0           | ]67.6, 100.0[ | 60.0            | ]23.1, 92.9[  | 2.500            |
| >3.6                    | 100.0           | ]67.6, 100.0[ | 80.0            | ]37.6, 100.0[ | 5.000            |
| >4.6                    | 100.0           | ]67.6, 100.0[ | 100.0           | ]56.6, 100.0[ | -                |
| >8.2                    | 85.5            | ]52.9, 99.4[  | 100.0           | ]56.6, 100.0[ | -                |
| >11.9                   | 75.0            | ]40.9, 95.6[  | 100.0           | ]56.6, 100.0[ | -                |
| >12.6                   | 62.5            | ]30.6, 86.3[  | 100.0           | ]56.6, 100.0[ | -                |
| >13.0                   | 50.0            | ]21.5, 78.5[  | 100.0           | ]56.6, 100.0[ | -                |
| >14.8                   | 37.5            | ]13.7, 69.4[  | 100.0           | ]56.6, 100.0[ | -                |
| >17.5                   | 25.0            | ]4.4, 59.1[   | 100.0           | ]56.6, 100.0[ | -                |
| >18.8                   | 12.5            | ]0.6, 47.1[   | 100.0           | ]56.6, 100.0[ | -                |

ROC curve AUC=1.000, SD=0.000, 95% CI=]1.000, 1.000[;  $p=0.003$ . At the optimal cut-off value of 4.6, LBGI<sub>FGMGT</sub> had 100% sensitivity and 100% specificity for the assessment of PBH severity (*No PBH*: LBGI<sub>FGMGT</sub>≤4.6; *PBH*: LBGI<sub>FGMGT</sub>>4.6). Abbreviations: ROC – receiver operating characteristic; CI = Confidence Interval; SD = Standard deviation; PBH – Post-bariatric hypoglycaemia; LBGI<sub>FGMGT</sub> – Low Blood Glucose Index (adjusted); AUC – Area under the curve.
